# Supplementary material for: High-resolution genome topology of human retina uncovers super enhancer-promoter interactions at tissue-specific and multifactorial disease loci
Source: PubMed Central journal article supplement (PMC9547065; doi:10.1038/s41467-022-33427-1), 2022-10-07
Supplement: 41467_2022_33427_MOESM3_ESM.pdf [file 41467_2022_33427_MOESM3_ESM.pdf]

## Description of Additional Supplementary Files

**Supplementary Data 1** : List of genes overlapping a SE, and their expression level in retina.

**Supplementary Data 2** : List of TF motifs enriched at the CRX and NRL binding loci that overlap a SE. P value presented have been FDR corrected.

**Supplementary Data 3** : List of retinal eQTLs and their associated features (loops, CREs, SEs, nearby genes, genes in contact).

**Supplementary Data 4** : List of AMD and glaucoma-associated genomic variants and the linked target genes.
